# Supplementary material for: Identification of GALNT14 as a novel neuroblastoma predisposition gene
Source: PubMed Central journal article supplement (PMC4694905; doi:10.18632/oncotarget.4501), 2015-07-03
Supplement: oncotarget-06-26335-s001.pdf [file oncotarget-06-26335-s001.pdf]

## SUPPLEMENTARY FIGURE AND TABLE

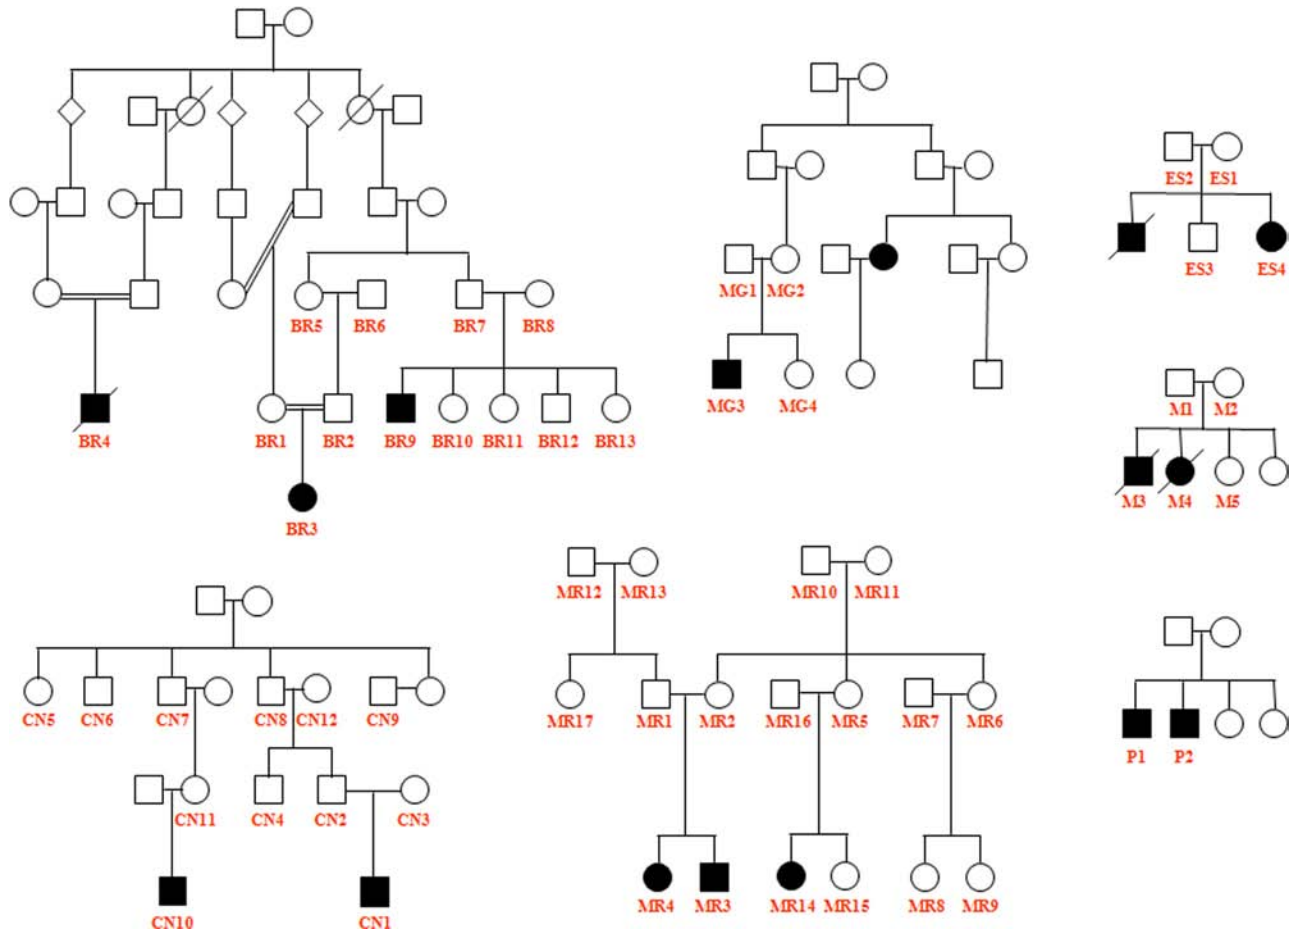

**Supplementary Figure S1: Additional families employed in the *GALNT14* mutation screening.** Overview of 7 additional pedigrees of families with hereditary NB that did not show the *c.802C > T GALNT14* mutation. Available individuals for analyses are indicated by a red code.

**Supplementary Table S1: Cell lines information**

| Cell line   | Origin                   | Tumor | MYCN Status |
|-------------|--------------------------|-------|-------------|
| SK-N-BE2(C) | BBCF                     | NB    | A           |
| UKF-NB3     | R. Luksch Lab            | NB    | A           |
| N206        | F. Speleman Lab          | NB    | A           |
| SK-N-BE2    | BBCF                     | NB    | A           |
| IMR32       | BBCF                     | NB    | A           |
| KELLY       | A. Quattrone Lab (ECACC) | NB    | A           |
| SK-N-SH     | BBCF                     | NB    | NA          |
| LAN1        | A. Quattrone Lab (ECACC) | NB    | A           |
| GILIN       | BBCF                     | NB    | A           |
| IMR5        | BBCF                     | NB    | A           |
| GICAN       | BBCF                     | NB    | NA          |
| ACN         | BBCF                     | NB    | NA          |
| GIMEN       | BBCF                     | NB    | NA          |
| NB1         | R. Luksch Lab            | NB    | NA          |
| SKNAS       | BBCF                     | NB    | NA          |

BBCF: Biological Bank and Cell Factory, Core Facility of the IRCCS AOU San Martino-IST in Genoa ([www.iclc.it](http://www.iclc.it)); ECACC: European Collection of Cell Cultures. A: Amplified; NA: Not Amplified.
